## STUDIES ON TUBERCULOSIS

By FLORENCE R. SABIN, M.D., CHARLES A. DOAN, M.D., AND CLAUDE E.  
FORKNER, M.D.

(From the Laboratories of The Rockefeller Institute for Medical Research)

PLATES 1 TO 10

(Received for publication, November 9, 1929)

### CONTENTS

|                                                                                                                                                                                                                                                                    |    |
|--------------------------------------------------------------------------------------------------------------------------------------------------------------------------------------------------------------------------------------------------------------------|----|
| CHAPTER I. REACTION OF THE CONNECTIVE TISSUES OF THE NORMAL RAB-<br>BIT TO LIPOIDS FROM THE TUBERCLE BACILLUS, STRAIN H-37.....                                                                                                                                    | 3  |
| Introduction.....                                                                                                                                                                                                                                                  | 3  |
| Reaction to the Phosphatide A-3.....                                                                                                                                                                                                                               | 5  |
| Reaction to the Fatty Acids, the Waxes, and the Glycerides....                                                                                                                                                                                                     | 21 |
| Effects of the Fatty Acid I.....                                                                                                                                                                                                                                   | 22 |
| Effects of the Purified Wax and Its Derivatives.....                                                                                                                                                                                                               | 30 |
| Effects of the Soft Wax and Its Derivative.....                                                                                                                                                                                                                    | 37 |
| Glycerides.....                                                                                                                                                                                                                                                    | 40 |
| Non-Specific Reactions to Lipoids, and Controls.....                                                                                                                                                                                                               | 46 |
| Normal Omentum and Peritoneal Fluid.....                                                                                                                                                                                                                           | 47 |
| Effects of the Vehicles Used in the Administration of the Tuber-<br>culo-Lipoid.....                                                                                                                                                                               | 49 |
| Special Controls for the Phosphatide Reactions.....                                                                                                                                                                                                                | 52 |
| Non-Specific Lipoid Fractions.....                                                                                                                                                                                                                                 | 54 |
| Protocols.....                                                                                                                                                                                                                                                     | 55 |
| General Discussion.....                                                                                                                                                                                                                                            | 60 |
| Bibliography.....                                                                                                                                                                                                                                                  | 69 |
| CHAPTER II. REACTION OF THE CONNECTIVE TISSUES OF THE NORMAL<br>RABBIT TO A WATER-SOLUBLE PROTEIN AND A POLYSACCHARIDE<br>FROM THE TUBERCLE BACILLUS, STRAIN H-37: SPONTANEOUS<br>PSEUDO-TUBERCULOSIS ASPERGILLINA AS A COMPLICATION IN FRAC-<br>TION TESTING..... | 73 |
| Reaction to the Protein.....                                                                                                                                                                                                                                       | 73 |
| Reaction to the Polysaccharide.....                                                                                                                                                                                                                                | 79 |
| Pseudo-Tuberculosis Aspergillina.....                                                                                                                                                                                                                              | 84 |
| Bibliography.....                                                                                                                                                                                                                                                  | 86 |

|                                                                                                                                                                         |     |
|-------------------------------------------------------------------------------------------------------------------------------------------------------------------------|-----|
| CHAPTER III. THE DERIVATION OF GIANT CELLS WITH ESPECIAL REFERENCE TO THOSE OF TUBERCULOSIS.....                                                                        | 89  |
| Introduction.....                                                                                                                                                       | 89  |
| Giant Cells in Tuberculosis.....                                                                                                                                        | 92  |
| Giant Cells after Tuberculo-Phosphatide.....                                                                                                                            | 94  |
| Giant Cells from the Other Lipoid Fractions from Tubercle Bacilli.                                                                                                      | 96  |
| Reaction to Different Menstrua Used for Introducing Substances into the Peritoneal Cavity.....                                                                          | 98  |
| Giant Cell Reactions to Typical Foreign Bodies.....                                                                                                                     | 101 |
| Discussion.....                                                                                                                                                         | 106 |
| Bibliography.....                                                                                                                                                       | 110 |
| CHAPTER IV. THE RELATION OF THE TUBERCLE AND THE MONOCYTE-LYMPHOCYTE RATIO TO RESISTANCE AND SUSCEPTIBILITY IN TUBERCULOSIS.....                                        | 113 |
| Introduction.....                                                                                                                                                       | 113 |
| Relation of the Pre-Infection M/L Index to Survival in Experimental Tuberculosis.....                                                                                   | 116 |
| Course of Tuberculous Infection in Rabbits Injected with an Antiserum for Rabbit Monocytes.....                                                                         | 118 |
| Course of Tuberculosis Following an Increase in Monocytes Experimentally Induced with Tuberculo-Phosphatide and Tuberculo-Fatty Acids .....                             | 133 |
| Course of Tuberculous Infection in Rabbits Receiving the Tuberculo-Phosphatide Intravenously in Antigenic Doses and in Rabbits Treated with Antiphosphatide Serum ..... | 140 |
| Discussion.....                                                                                                                                                         | 146 |
| Summary.....                                                                                                                                                            | 149 |
| Bibliography.....                                                                                                                                                       | 151 |
